# Supplementary material
Source: Springer Nature journal article supplement (https://www.springermedizin.de/resource/supplementary/12911_2007_167_MOESM7_ESM.pdf/9527284)

ANN1 model

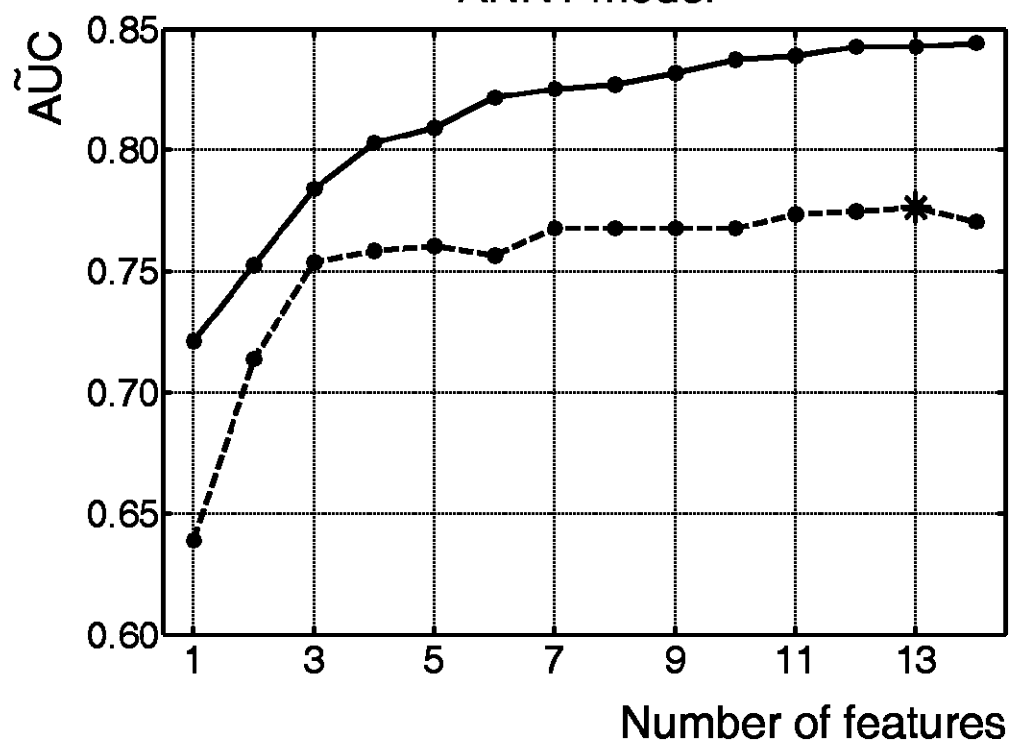

Supplement: MOESM7 [file 9527284]
